# Supplementary material for: Screening for Influenza and Morbillivirus in Seals and Porpoises in the Baltic and North Sea
Source: MDPI journal article supplement (doi:10.3390/pathogens12030357), 2023-02-21
Supplement: s1 [file s1]

# SUPPLEMENTARY MATERIAL

Supplementary Table S1

| Sample number | Species   | Collection date | Sex    | Age   | Country | Area           | Origin of animal | Swab | Tissue | Extraction |
|---------------|-----------|-----------------|--------|-------|---------|----------------|------------------|------|--------|------------|
| HG-SE-001     | Grey seal | 2002-12-28      | Male   | 3     | Sweden  | Arkona Basin   | Found dead       |      | +      | IL         |
| HG-SE-002     | Grey seal | 2002-10-25      | Male   | 14    | Sweden  | Baltic proper  | Shot             |      | +      | IL         |
| HG-SE-003     | Grey seal | 2002-05-10      | Female | 13    | Sweden  | Bothnian Bay   | Shot             |      | +      | IL         |
| HG-SE-004     | Grey seal | 2002-11-03      | Female | 3     | Sweden  | Bothnian Bay   | Shot             |      | +      | IL         |
| HG-SE-005     | Grey seal | 2002-04-25      | Female | 0-1   | Sweden  | Bothnian Sea   | Bycaught         |      | +      | IL         |
| HG-SE-006     | Grey seal | 2002-08-20      | Female | 0-1   | Sweden  | Bothnian Sea   | Shot             |      | +      | IL         |
| HG-SE-007     | Grey seal | 2002-10-21      | Female | 11    | Sweden  | Bothnian Sea   | Bycaught         |      | +      | IL         |
| HG-SE-008     | Grey seal | 2002-04-03      | Male   | 6     | Sweden  | Skagerrak      | Found dead       |      | +      | IL         |
| HG-SE-009     | Grey seal | 2003-05-25      | Female | 5     | Sweden  | Baltic proper  | Bycaught         |      | +      | IL         |
| HG-SE-010     | Grey seal | 2003-11-16      | Male   | 32    | Sweden  | Baltic proper  | Bycaught         |      | +      | IL         |
| HG-SE-011     | Grey seal | 2003-04-22      | Male   | 0-1   | Sweden  | Bornholm Basin | Bycaught         |      | +      | IL         |
| HG-SE-012     | Grey seal | 2003-05-04      | Male   | 3     | Sweden  | Bothnian Sea   | Bycaught         |      | +      | IL         |
| HG-SE-013     | Grey seal | 2003-07-08      | Female | 3     | Sweden  | Bothnian Sea   | Shot             |      | +      | IL         |
| HG-DK-001     | Grey seal | 2010-06-26      | Male   | Young | Denmark | Kattegat       | Shot             |      | +      | PL         |
| HG-DK-002     | Grey seal | 2010-03-03      | Male   | Adult | Denmark | The Sound      | Found dead       |      | +      | PL         |
| HG-DK-003     | Grey seal | 2012-08-12      | Male   | -     | Denmark | SW Baltic      | Shot             |      | +      | PL         |
| HG-SE-014     | Grey seal | 2013-04-21      | Female | 3     | Sweden  | Baltic proper  | Shot             |      | +      | IL         |
| HG-SE-015     | Grey seal | 2013-08-07      | Male   | 0     | Sweden  | Baltic proper  | Entanglement     |      | +      | IL         |
| HG-SE-016     | Grey seal | 2013-05-11      | Female | 0     | Sweden  | Bothnian Bay   | Shot             |      | +      | IL         |
| HG-SE-017     | Grey seal | 2013-07-25      | Female | 5     | Sweden  | Bothnian Bay   | Shot             |      | +      | IL         |
| HG-SE-018     | Grey seal | 2013-04-27      | Male   | 17    | Sweden  | Bothnian Sea   | Shot             |      | +      | IL         |
| HG-SE-019     | Grey seal | 2013-08-01      | Female | 6     | Sweden  | Bothnian Sea   | Shot             |      | +      | IL         |
| HG-DK-004     | Grey seal | 2014-01-15      | -      | -     | Denmark | Arkona Basin   | Found dead       |      | +      | PL         |
| HG-DK-005     | Grey seal | 2014-11-22      | Male   | -     | Denmark | Arkona Basin   | Found dead       |      | +      | PL         |

| Sample number | Species   | Collection date | Sex    | Age      | Country | Area           | Origin of animal | Swab | Tissue | Extraction |
|---------------|-----------|-----------------|--------|----------|---------|----------------|------------------|------|--------|------------|
| HG-SE-020     | Grey seal | 2014-04-25      | Female | 19       | Sweden  | Baltic proper  | Shot             |      | +      | IL         |
| HG-SE-021     | Grey seal | 2014-08-25      | Female | 3        | Sweden  | Baltic proper  | Entanglement     |      | +      | IL         |
| HG-SE-022     | Grey seal | 2014-12-31      | Male   | 2        | Sweden  | Bornholm Basin | Shot             |      | +      | IL         |
| HG-SE-023     | Grey seal | 2014-12-31      | Male   | 2        | Sweden  | Bornholm Basin | Shot             |      | +      | IL         |
| HG-SE-024     | Grey seal | 2014-05-11      | Male   | 8        | Sweden  | Bothnian Bay   | Shot             |      | +      | IL         |
| HG-SE-025     | Grey seal | 2014-08-24      | Male   | 10       | Sweden  | Bothnian Bay   | Shot             |      | +      | IL         |
| HG-SE-026     | Grey seal | 2014-07-19      | Male   | 4        | Sweden  | Bothnian Sea   | Shot             |      | +      | IL         |
| HG-SE-027     | Grey seal | 2014-10-24      | Male   | 2        | Sweden  | Bothnian Sea   | Entanglement     |      | +      | IL         |
| HG-DK-006     | Grey seal | 2014-05-02      | -      | Pub      | Denmark | Danish Straits | Found dead       |      | +      | PL         |
| HG-DK-007     | Grey seal | 2014-04-23      | Female | Adult    | Denmark | SW Baltic      | Found dead       |      | +      | PL         |
| HG-DK-008     | Grey seal | 2014-11-22      | Male   | Adult    | Denmark | The Sound      | Found dead       |      | +      | PL         |
| HG-DK-009     | Grey seal | 2014-03-02      | Female | Juvenile | Denmark | West coast     | Shot             |      | +      | PL         |
| HG-SE-028     | Grey seal | 2015-04-28      | Male   | 7        | Sweden  | Baltic proper  | Shot             |      | +      | IL         |
| HG-SE-029     | Grey seal | 2015-05-08      | Male   | 5        | Sweden  | Bornholm Basin | Shot             |      | +      | IL         |
| HG-SE-030     | Grey seal | 2015-08-13      | Female | 8        | Sweden  | Bornholm Basin | Shot             |      | +      | IL         |
| HG-SE-031     | Grey seal | 2015-11-03      | Male   | 12       | Sweden  | Bornholm Basin | Shot             |      | +      | IL         |
| HG-SE-032     | Grey seal | 2015-05-08      | Male   | 18       | Sweden  | Bothnian Bay   | Shot             |      | +      | IL         |
| HG-SE-033     | Grey seal | 2015-04-24      | Female | -        | Sweden  | Bothnian Sea   | Shot             | +    | +      | SP, IL     |
| HG-SE-034     | Grey seal | 2015-04-24      | -      | -        | Sweden  | Bothnian Sea   | Shot             | +    | +      | SP, IL     |
| HG-SE-035     | Grey seal | 2015-04-25      | Male   | -        | Sweden  | Bothnian Sea   | Shot             | +    | +      | SP, IL     |
| HG-SE-036     | Grey seal | 2015-04-25      | Male   | -        | Sweden  | Bothnian Sea   | Shot             | +    | +      | SP, IL     |
| HG-SE-037     | Grey seal | 2015-07-15      | Female | 2        | Sweden  | Bothnian Sea   | Shot             |      | +      | IL         |
| HG-SE-038     | Grey seal | 2016-09-19      | Female | -        | Sweden  | Bothnian Sea   | Shot             | +    | +      | SP, IL     |
| HG-PL-001     | Grey seal | 2017-07-12      | Female | Yearling | Poland  | Bornholm Basin | Euthanized       | +    | +      | SP, IL     |

| Sample number | Species   | Collection date | Sex    | Age      | Country | Area          | Origin of animal | Swab | Tissue | Extraction |
|---------------|-----------|-----------------|--------|----------|---------|---------------|------------------|------|--------|------------|
| HG-SE-039     | Grey seal | 2018-09-02      | Female | Adult    | Sweden  | Arkona Basin  | Shot             | +    | +      | SP, IS     |
| HG-SE-040     | Grey seal | 2018-09-02      | Male   | Adult    | Sweden  | Arkona Basin  | Shot             | +    | +      | SP, IL     |
| HG-SE-041     | Grey seal | 2018-09-02      | Female | Adult    | Sweden  | Arkona basin  | Shot             | +    | +      | SP, IL     |
| HG-PL-002     | Grey seal | 2018-03-16      | Male   | Adult    | Poland  | Baltic proper | Found dead       | +    | +      | SP, IL     |
| HG-PL-003     | Grey seal | 2018-04-05      | Male   | Pup      | Poland  | Baltic proper | Euthanized       |      | +      | IL         |
| HG-PL-004     | Grey seal | 2018-06-06      | Female | Yearling | Poland  | Baltic proper | Found dead       | +    |        | SP         |
| HG-PL-005     | Grey seal | 2018-06-14      | Female | Yearling | Poland  | Baltic proper | Found dead       | +    | +      | SP, IL     |
| HG-SE-042     | Grey seal | 2018-08-05      | Male   | Juvenile | Sweden  | Baltic proper | Shot             | +    |        | SP, IL     |
| HG-SE-043     | Grey seal | 2018-08-05      | Male   | Adult    | Sweden  | Baltic proper | Shot             | +    | +      | SP, IL     |
| HG-SE-044     | Grey seal | 2018-08-05      | Male   | Juvenile | Sweden  | Baltic proper | Shot             | +    | +      | SP, IL     |
| HG-SE-045     | Grey seal | 2018-08-05      | Male   | Juvenile | Sweden  | Baltic proper | Shot             | +    | +      | SP, IL     |
| HG-SE-046     | Grey seal | 2018-08-05      | Male   | Juvenile | Sweden  | Baltic proper | Shot             | +    | +      | SP, IL     |
| HG-SE-047     | Grey seal | 2018-08-05      | Female | Juvenile | Sweden  | Baltic proper | Shot             |      | +      | IL         |
| HG-SE-048     | Grey seal | 2018-08-05      | Male   | Juvenile | Sweden  | Baltic proper | Shot             | +    | +      | SP, IL     |
| HG-SE-049     | Grey seal | 2018-08-06      | Male   | Adult    | Sweden  | Baltic proper | Shot             | +    |        | SP, IL     |
| HG-SE-050     | Grey seal | 2018-08-07      | Male   | Juvenile | Sweden  | Baltic proper | Shot             | +    | +      | SP, IL     |
| HG-SE-051     | Grey seal | 2018-08-07      | Female | Juvenile | Sweden  | Baltic proper | Shot             | +    | +      | SP, IL     |
| HG-SE-052     | Grey seal | 2018-08-29      | Male   | -        | Sweden  | Baltic proper | Shot             | +    | +      | SP, IL     |
| HG-SE-053     | Grey seal | 2018-08-31      | Male   | Juvenile | Sweden  | Baltic proper | Shot             | +    | +      | SP, IL     |
| HG-SE-054     | Grey seal | 2018-09-05      | Female | -        | Sweden  | Baltic proper | Shot             |      | +      | IL         |
| HG-SE-055     | Grey seal | 2018-09-13      | Male   | -        | Sweden  | Baltic proper | Shot             |      | +      | IL         |
| HG-SE-056     | Grey seal | 2018-09-19      | Male   | Juvenile | Sweden  | Baltic proper | Shot             |      | +      | IL         |
| HG-PL-006     | Grey seal | 2018-10-25      | Male   | Yearling | Poland  | Baltic proper | Euthanized       | +    | +      | SP, IL     |
| HG-SE-057     | Grey seal | 2018-?-?        | Female | -        | Sweden  | Baltic proper | Shot             | +    | +      | SP, IL     |

| Sample number | Species   | Collection date | Sex    | Age      | Country | Area           | Origin of animal | Swab | Tissue | Extraction |
|---------------|-----------|-----------------|--------|----------|---------|----------------|------------------|------|--------|------------|
| HG-SE-058     | Grey seal | 2018-?-?        | Female | Juvenile | Sweden  | Baltic proper  | Shot             | +    | +      | SP, IL     |
| HG-PL-007     | Grey seal | 2018-05-01      | Male   | Yearling | Poland  | Bornholm Basin | Found dead       | +    | +      | SP, IL     |
| HG-SE-059     | Grey seal | 2018-08-05      | Male   | -        | Sweden  | Bornholm Basin | Shot             | +    | +      | SP, IL     |
| HG-SE-060     | Grey seal | 2018-08-29      | Female | Adult    | Sweden  | Bornholm Basin | Shot             | +    | +      | SP, IL     |
| HG-SE-061     | Grey seal | 2018-09-07      | Female | -        | Sweden  | Bornholm Basin | Shot             | +    | +      | SP, IL     |
| HG-SE-062     | Grey seal | 2018-08-26      | Male   | Adult    | Sweden  | Bornholm Basin | Shot             | +    | +      | SP, IL     |
| HG-SE-063     | Grey seal | 2018-09-02      | -      | -        | Sweden  | Bothnian Bay   | Shot             | +    | +      | SP, IL     |
| HG-SE-064     | Grey seal | 2018-09-02      | Female | Juvenile | Sweden  | Bothnian Bay   | Bycaught         | +    | +      | SP, IL     |
| HG-SE-065     | Grey seal | 2018-08-02      | Female | Juvenile | Sweden  | Bothnian Sea   | Shot             | +    | +      | SP, IL     |
| HG-SE-066     | Grey seal | 2018-08-02      | Male   | Juvenile | Sweden  | Bothnian Sea   | Shot             | +    | +      | SP, IL     |
| HG-SE-067     | Grey seal | 2018-08-02      | -      | -        | Sweden  | Bothnian Sea   | Shot             | +    | +      | SP, IL     |
| HG-SE-068     | Grey seal | 2018-08-03      | Male   | Subadult | Sweden  | Bothnian Sea   | Shot             | +    | +      | SP, IL     |
| HG-SE-069     | Grey seal | 2018-08-03      | Female | Adult    | Sweden  | Bothnian Sea   | Shot             | +    | +      | SP, IL     |
| HG-SE-070     | Grey seal | 2018-08-04      | Female | Adult    | Sweden  | Bothnian Sea   | Shot             | +    | +      | SP, IL     |
| HG-SE-071     | Grey seal | 2018-08-04      | Female | Adult    | Sweden  | Bothnian Sea   | Shot             | +    | +      | SP, IL     |
| HG-SE-072     | Grey seal | 2018-08-10      | Male   | -        | Sweden  | Bothnian Sea   | Shot             | +    | +      | SP, IL     |
| HG-SE-073     | Grey seal | 2018-08-14      | Male   | Adult    | Sweden  | Bothnian Sea   | Shot             | +    | +      | SP, IL     |
| HG-SE-074     | Grey seal | 2018-08-14      | Female | Adult    | Sweden  | Bothnian Sea   | Shot             | +    | +      | SP, IL     |
| HG-SE-075     | Grey seal | 2018-08-14      | Female | Adult    | Sweden  | Bothnian Sea   | Shot             | +    | +      | SP, IL     |
| HG-SE-076     | Grey seal | 2018-08-15      | Male   | Adult    | Sweden  | Bothnian Sea   | Shot             | +    | +      | SP, IL     |
| HG-SE-077     | Grey seal | 2018-08-15      | Female | Juvenile | Sweden  | Bothnian Sea   | Shot             | +    | +      | SP, IL     |
| HG-SE-078     | Grey seal | 2018-08-15      | Male   | -        | Sweden  | Bothnian Sea   | Shot             | +    | +      | SP, IL     |
| HG-SE-079     | Grey seal | 2018-08-15      | Female | Juvenile | Sweden  | Bothnian Sea   | Shot             | +    | +      | SP, IL     |
| HG-SE-080     | Grey seal | 2018-08-20      | Male   | Adult    | Sweden  | Bothnian Sea   | Shot             | +    | +      | SP, IL     |

| Sample number | Species   | Collection date | Sex    | Age      | Country | Area          | Origin of animal | Swab | Tissue | Extraction |
|---------------|-----------|-----------------|--------|----------|---------|---------------|------------------|------|--------|------------|
| HG-SE-081     | Grey seal | 2018-08-20      | Female | Adult    | Sweden  | Bothnian Sea  | Shot             | +    | +      | SP, IL     |
| HG-SE-082     | Grey seal | 2018-08-22      | Female | Adult    | Sweden  | Bothnian Sea  | Shot             | +    | +      | SP, IL     |
| HG-SE-083     | Grey seal | 2018-08-22      | Male   | Adult    | Sweden  | Bothnian Sea  | Shot             | +    | +      | SP, IL     |
| HG-SE-084     | Grey seal | 2018-08-22      | Female | Juvenile | Sweden  | Bothnian Sea  | Shot             | +    | +      | SP, IL     |
| HG-SE-085     | Grey seal | 2018-08-22      | Female | Adult    | Sweden  | Bothnian Sea  | Shot             | +    | +      | SP, IL     |
| HG-SE-086     | Grey seal | 2018-08-24      | Female | Adult    | Sweden  | Bothnian Sea  | Shot             | +    | +      | SP, IL     |
| HG-SE-087     | Grey seal | 2018-08-25      | Female | Adult    | Sweden  | Bothnian Sea  | Shot             | +    | +      | SP, IL     |
| HG-SE-088     | Grey seal | 2018-08-25      | Female | Adult    | Sweden  | Bothnian Sea  | Bycaught         | +    | +      | SP, IL     |
| HG-SE-089     | Grey seal | 2018-09-02      | Male   | Adult    | Sweden  | Bothnian Sea  | Shot             | +    | +      | SP, IL     |
| HG-SE-090     | Grey seal | 2018-09-02      | Female | Juvenile | Sweden  | Bothnian Sea  | Shot             | +    | +      | SP, IL     |
| HG-SE-091     | Grey seal | 2018-09-02      | Female | Juvenile | Sweden  | Bothnian Sea  | Shot             | +    | +      | SP, IL     |
| HG-SE-092     | Grey seal | 2018-09-04      | Female | Adult    | Sweden  | Bothnian Sea  | Shot             | +    | +      | SP, IL     |
| HG-SE-093     | Grey seal | 2018-09-04      | Female | Adult    | Sweden  | Bothnian Sea  | Shot             | +    | +      | SP, IL     |
| HG-SE-094     | Grey seal | 2018-09-04      | Female | Adult    | Sweden  | Bothnian Sea  | Shot             | +    | +      | SP, IL     |
| HG-SE-095     | Grey seal | 2018-09-04      | Female | Adult    | Sweden  | Bothnian Sea  | Shot             | +    | +      | SP, IL     |
| HG-SE-096     | Grey seal | 2018-09-07      | Female | -        | Sweden  | Bothnian Sea  | Shot             | +    | +      | SP, IL     |
| HG-SE-097     | Grey seal | 2018-09-13      | Male   | Adult    | Sweden  | Bothnian Sea  | Shot             | +    | +      | SP, IL     |
| HG-SE-098     | Grey seal | 2018-10-01      | Female | Juvenile | Sweden  | Bothnian Sea  | Shot             | +    | +      | SP, IL     |
| HG-SE-099     | Grey seal | 2018-10-20      | Male   | -        | Sweden  | Bothnian Sea  | Shot             | +    | +      | SP, IL     |
| HG-GE-001     | Grey seal | 2018-07-31      | Female | Adult    | Germany | North Sea     | Shot             | +    | +      | SP, IL     |
| HG-DK-010     | Grey seal | 2019-02-05      | Female | Adult    | Denmark | Arkona Basin  | Shot             | +    | +      | SP, IL     |
| HG-DK-011     | Grey seal | 2019-10-01      | Male   | Adult    | Denmark | Arkona Basin  | Shot             | +    | +      | SP, IL     |
| HG-SE-100     | Grey seal | 2019-08-03      | Male   | -        | Sweden  | Baltic proper | Bycaught         |      | +      | IL         |
| HG-SE-101     | Grey seal | 2019-08-15      | Male   | -        | Sweden  | Baltic proper | Bycaught         | +    | +      | SP, IL     |

| Sample number | Species   | Collection date | Sex    | Age | Country | Area          | Origin of animal | Swab | Tissue | Extraction |
|---------------|-----------|-----------------|--------|-----|---------|---------------|------------------|------|--------|------------|
| HG-SE-102     | Grey seal | 2019-09-04      | Male   | -   | Sweden  | Baltic proper | Bycaught         | +    | +      | SP, IL     |
| HG-SE-103     | Grey seal | 2019-09-16      | Female | -   | Sweden  | Baltic proper | Bycaught         |      | +      | IL         |
| HG-SE-104     | Grey seal | 2019-10-15      | Male   | -   | Sweden  | Baltic proper | Shot             | +    | +      | SP, IL     |
| HG-SE-105     | Grey seal | 2019-08-10      | Fenale | -   | Sweden  | Bothnian Sea  | Shot             | +    | +      | SP, IL     |
| HG-GE-002     | Grey seal | 2019-03-23      | Male   | -   | Germany | North Sea     | Shot             | +    | +      | SP, IL     |
| HG-PL-008     | Grey seal | 2019-04-14      | Male   | -   | Poland  | -             | Found dead       | +    | +      | SP, IL     |

**Supplementary Table S1.** Overview of grey seal samples screened in this study including sample information such as collection date, sex, age, collection area and sample type listed when possible. (-) indicates that there is no available information. The sample type for each extraction is indicated by SP = Pooled extractions of tracheal swabs, IL = Individual extraction from lung tissue, PL = Pooled extractions of lung tissue from 3-5 individuals.

**Supplementary Table S2**

| Sample number | Species      | Collection date | Sex    | Age               | Country | Area                       | Origin of animal | Swab | Tissue | Extraction |
|---------------|--------------|-----------------|--------|-------------------|---------|----------------------------|------------------|------|--------|------------|
| PV-SE-001     | Harbour seal | 2002-09-07      | Male   | 2                 | Sweden  | Baltic proper (Kalmarsund) | Found dead       | -    | +      | IL         |
| PV-SE-002     | Harbour seal | 2002-07-25      | Male   | 4                 | Sweden  | Skagerrak                  | Found dead       | -    | +      | IL         |
| PV-SE-003     | Harbour seal | 2003-10-14      | Male   | -                 | Sweden  | Baltic proper (Kalmarsund) | Bycaught         | -    | +      | IL         |
| PV-DK-001     | Harbour seal | 2003-05-27      | Female | 2 years           | Denmark | Danish straits             | Shot             | -    | +      | PL         |
| PV-DK-002     | Harbour seal | 2003-08-04      | Male   | -                 | Denmark | Danish straits             | Shot             | -    | +      | PL         |
| PV-DK-003     | Harbour seal | 2006-11-15      | Female | 1-2 years         | Denmark | Danish straits             | Shot             | -    | +      | PL         |
| PV-DK-004     | Harbour seal | 2006-09-22      | Female | 2-3 years         | Denmark | Kattegat                   | Bycaught         | -    | +      | PL         |
| PV-DK-005     | Harbour seal | 2006-09-22      | Male   | 0-1 years         | Denmark | Kattegat                   | Bycaught         | -    | +      | PL         |
| PV-DK-006     | Harbour seal | 2007-06-21      | Female | 0 years           | Denmark | Kattegat                   | Found dead       | -    | +      | PL         |
| PV-DK-007     | Harbour seal | 2007-06-21      | Male   | 1-2 years         | Denmark | Kattegat                   | Found dead       | -    | +      | PL         |
| PV-DK-008     | Harbour seal | 2007-06-21      | Male   | 1-2 Years         | Denmark | Kattegat                   | Found dead       | -    | +      | PL         |
| PV-DK-009     | Harbour seal | 2007-06-21      | Male   | > 1 years         | Denmark | Kattegat                   | Found dead       | -    | +      | PL         |
| PV-DK-010     | Harbour seal | 2007-06-21      | Female | > 1 years         | Denmark | Kattegat                   | Found dead       | -    | +      | PL         |
| PV-DK-011     | Harbour seal | 2007-06-21      | Female | > 1 years         | Denmark | Kattegat                   | Found dead       | -    | +      | PL         |
| PV-DK-012     | Harbour seal | 2007-06-21      | Female | > 1 years         | Denmark | Kattegat                   | Found dead       | -    | +      | PL         |
| PV-DK-013     | Harbour seal | 2007-06-21      | Female | > 1 years         | Denmark | Kattegat                   | Found dead       | -    | +      | PL         |
| PV-DK-014     | Harbour seal | 2007-06-21      | Female | 1                 | Denmark | Kattegat                   | Found dead       | -    | +      | PL         |
| PV-DK-015     | Harbour seal | 2008-09-30      | Female | Adult             | Denmark | Danish straits             | Shot             | -    | +      | PL         |
| PV-DK-016     | Harbour seal | 2008-06-16      | Male   | 0 years           | Denmark | Kattegat                   | Found dead       | -    | +      | PL         |
| PV-DK-017     | Harbour seal | 2010-08-12      | Male   | -                 | Denmark | Arkona Basin               | Shot             | -    | +      | PL         |
| PV-DK-018     | Harbour seal | 2010-11-21      | Female | Adult             | Denmark | Danish straits             | NA               | -    | +      | IL         |
| PV-DK-019     | Harbour seal | 2010-07-01      | Female | Juvenile/Yearling | Denmark | Kattegat                   | Found dead       | -    | +      | PL         |
| PV-DK-020     | Harbour seal | 2011-05-11      | Male   | Adult             | Denmark | Danish straits             | Shot             | -    | +      | PL         |
| PV-DK-021     | Harbour seal | 2012-08-12      | Female | -                 | Denmark | Arkona Basin               | Shot             | -    | +      | PL         |
| PV-DK-022     | Harbour seal | 2012-08-12      | Male   | Adult             | Denmark | Arkona Basin               | Shot             | -    | +      | IL         |

| Sample number | Species      | Collection date | Sex    | Age          | Country | Area           | Origin of animal | Swab | Tissue | Extraction |
|---------------|--------------|-----------------|--------|--------------|---------|----------------|------------------|------|--------|------------|
| PV-DK-023     | Harbour seal | 2012-09-29      | Female | 2-3 years    | Denmark | Arkona Basin   | Shot             | -    | +      | PL         |
| PV-SE-004     | Harbour seal | 2012-11-13      | Male   | 8            | Sweden  | Baltic proper  | Shot             | -    | +      | IL         |
| PV-DK-024     | Harbour seal | 2012-08-22      | Male   | Juvenile     | Denmark | Danish straits | Shot             | -    | +      | PL         |
| PV-DK-025     | Harbour seal | 2012-05-25      | Female | -            | Denmark | The Sound      | Shot             | -    | +      | PL         |
| PV-DK-026     | Harbour seal | 2014-11-24      | Male   | -            | Denmark | Arkona Basin   | Bycaught         | -    | +      | PL         |
| PV-SE-005     | Harbour seal | 2014-04-01      | Male   | 2            | Sweden  | Baltic proper  | Entanglement     | -    | +      | IL         |
| PV-SE-006     | Harbour seal | 2014-09-21      | Male   | 6            | Sweden  | Baltic proper  | Entanglement     | -    | +      | IL         |
| PV-DK-027     | Harbour seal | 2014-09-13      | Male   | 0            | Denmark | Kattegat       | Found dead       | -    | +      | PL, IL     |
| PV-DK-028     | Harbour seal | 2014-08-29      | Female | -            | Denmark | Limfjorden     | Euthanized       | -    | +      | PL, IL     |
| PV-DK-029     | Harbour seal | 2014-08-29      | Male   | -            | Denmark | Limfjorden     | Euthanized       | -    | +      | PL, IL     |
| PV-DK-030     | Harbour seal | 2014-08-29      | Male   | -            | Denmark | Limfjorden     | Euthanized       | -    | +      | PL, IL     |
| PV-DK-031     | Harbour seal | 2014-08-29      | Female | -            | Denmark | Limfjorden     | Euthanized       | -    | +      | PL, IL     |
| PV-DK-032     | Harbour seal | 2014-02-21      | Female | Juvenile     | Denmark | North Sea      | Found dead       | -    | +      | PL         |
| PV-DK-033     | Harbour seal | 2014-04-28      | Female | Adult        | Denmark | North Sea      | Shot             | -    | +      | PL         |
| PV-DK-034     | Harbour seal | 2014-05-07      | Female | Young        | Denmark | The Sound      | Shot             | -    | +      | PL         |
| PV-DK-035     | Harbour seal | 2014-05-07      | Female | Young        | Denmark | The Sound      | Shot             | -    | +      | PL         |
| PV-DK-036     | Harbour seal | 2014-05-07      | Male   | Adult        | Denmark | The Sound      | Shot             | -    | +      | PL         |
| PV-DK-037     | Harbour seal | 2014-08-28      | Female | Young        | Denmark | The Sound      | Shot             | -    | +      | PL         |
| PV-DK-038     | Harbour seal | 2014-08-28      | Female | Adult        | Denmark | The Sound      | Shot             | -    | +      | PL         |
| PV-SE-007     | Harbour seal | 2015-02-03      | Female | 3            | Sweden  | The Sound      | Entanglement     | -    | +      | IL         |
| PV-DK-039     | Harbour seal | 2015-04-07      | Female | Immature     | Denmark | The Sound      | Shot             | -    | +      | PL         |
| PV-DK-040     | Harbour seal | 2016-01-15      | Male   | Adult        | Denmark | The Sound      | Shot             | -    | +      | PL         |
| PV-SE-008     | Harbour seal | 2018-10-11      | Male   | -            | Sweden  | Bornholm Basin | Bycaught         | -    | +      | IL         |
| PV-DK-041     | Harbour seal | 2018-08-20      | Male   | Current year | Denmark | Danish Straits | Bycaught         | +    | +      | SP, IL     |
| PV-DK-042     | Harbour seal | 2018-10-29      | Female | Adult        | Denmark | Danish Straits | Shot             | +    | +      | SP, IL     |



| Sample number | Species      | Collection date | Sex    | Age      | Country | Area           | Origin of animal | Swab | Tissue | Extraction |
|---------------|--------------|-----------------|--------|----------|---------|----------------|------------------|------|--------|------------|
| PV-GE-001     | Harbour seal | 2018-11-01      | Male   | -        | Germany | Danish Straits | Euthanized       | +    | +      | SP, IL     |
| PV-SE-009     | Harbour seal | 2018-11-21      | Female | Adult    | Sweden  | Kattegat       | Shot             |      | +      | IL         |
| PV-SE-010     | Harbour seal | 2018-12-25      | Male   | Adult    | Sweden  | Kattegat       | Shot             | +    | +      | SP, IL     |
| PV-SE-011     | Harbour seal | 2018-10-01      | Female | Adult    | Sweden  | Kattegat       | Shot             | +    | +      | SP, IL     |
| PV-SE-012     | Harbour seal | 2018-10-01      | Female | 0-1      | Sweden  | Kattegat       | Shot             | +    | +      | SP, IL     |
| PV-SE-013     | Harbour seal | 2018-10-01      | Male   | 0-1      | Sweden  | Kattegat       | Shot             | +    | +      | SP, IL     |
| PV-SE-014     | Harbour seal | 2018-10-04      | Female | 0-1      | Sweden  | Kattegat       | Shot             | +    | +      | SP, IL     |
| PV-SE-015     | Harbour seal | 2018-10-04      | Male   | 0-1      | Sweden  | Kattegat       | Shot             | +    | +      | SP, IL     |
| PV-SE-016     | Harbour seal | 2018-10-07      | Female | -        | Sweden  | Kattegat       | Shot             | +    | +      | SP, IL     |
| PV-SE-017     | Harbour seal | 2018-10-07      | Female | 0-1      | Sweden  | Kattegat       | Shot             | +    | +      | SP, IL     |
| PV-GE-002     | Harbour seal | 2018-01-13      | Female | Adult    | Germany | North Sea      | Found dead       | +    | +      | SP, IL     |
| PV-GE-003     | Harbour seal | 2019-02-20      | Female | Adult    | Germany | North Sea      | Found dead       |      | +      | IL         |
| PV-GE-004     | Harbour seal | 2018-10-05      | Male   | -        | Germany | North Sea      | Shot             | +    | +      | SP, IL*    |
| PV-GE-005     | Harbour seal | 2018-12-03      | Female | Adult    | Germany | North Sea      | Found dead       | +    | +      | SP, IL*    |
| PV-GE-006     | Harbour seal | 2018-12-08      | Female | Adult    | Germany | North Sea      | Found dead       | +    | +      | SP, IL*    |
| PV-GE-007     | Harbour seal | 2018-12-09      | Female | Adult    | Germany | North Sea      | Found dead       | +    | +      | SP, IL*    |
| PV-GE-008     | Harbour seal | 2018-12-09      | Female | Adult    | Germany | North Sea      | Found dead       | +    | +      | SP, IL*    |
| PV-GE-009     | Harbour seal | 2018-12-09      | Female | Adult    | Germany | North Sea      | Found dead       | +    | +      | SP, IL*    |
| PV-GE-010     | Harbour seal | 2018-12-10      | Female | Adult    | Germany | North Sea      | Found dead       | +    | +      | SP, IL*    |
| PV-GE-011     | Harbour seal | 2018-12-11      | Female | Adult    | Germany | North Sea      | Found dead       | +    | +      | SP, IL*    |
| PV-GE-012     | Harbour seal | 2018-12-30      | Female | Adult    | Germany | North Sea      | Found dead       | +    | +      | SP, IL*    |
| PV-SE-018     | Harbour seal | 2018-10-01      | -      | -        | Sweden  | Skagerarak     | Shot             |      | +      | IL         |
| PV-SE-019     | Harbour seal | 2018-10-12      | Female | Adult    | Sweden  | Skagerrak      | Shot             | +    | +      | SP, IL     |
| PV-SE-020     | Harbour seal | 2018-12-25      | Female | Adult    | Sweden  | Skagerrak      | Shot             | +    |        | SP         |
| PV-DK-043     | Harbour seal | 2018-10-10      | Male   | Juvenile | Denmark | The Sound      | Shot             |      | +      | PL         |

| Sample number | Species      | Collection date | Sex    | Age          | Country | Area           | Origin of animal | Swab | Tissue | Extraction |
|---------------|--------------|-----------------|--------|--------------|---------|----------------|------------------|------|--------|------------|
| PV-DK-044     | Harbour seal | 2018-10-10      | -      | -            | Denmark | The Sound      | NA               |      | +      | PL         |
| PV-DK-045     | Harbour seal | 2019-07-21      | Male   | Last year    | Denmark | Danish Straits | Bycaught         | +    |        | SP         |
| PV-DK-046     | Harbour seal | 2019-08-11      | Female | Current year | Denmark | Danish Straits | Bycaught         | +    | +      | SP, IL     |
| PV-DK-047     | Harbour seal | 2019-08-28      | Male   | Last year    | Denmark | Danish Straits | Bycaught         | +    | +      | SP, IL     |
| PV-DK-048     | Harbour seal | 2019-09-18      | Female | Current year | Denmark | Danish Straits | Shot             | +    | +      | SP, IL     |
| PV-DK-049     | Harbour seal | 2019-10-09      | Male   | Last year    | Denmark | Danish Straits | Shot             | +    | +      | SP, IL     |
| PV-DK-050     | Harbour seal | 2019-10-22      | Female | Last year    | Denmark | Danish Straits | Bycaught         | +    | +      | SP, IL     |
| PV-DK-051     | Harbour seal | 2019-04-28      | Male   | Last year    | Denmark | Kattegat       | Bycaught         | +    | +      | SP, IL     |
| PV-DK-052     | Harbour seal | 2019-04-28      | Female | Last year    | Denmark | Kattegat       | Shot             | +    | +      | SP, IL     |
| PV-GE-013     | Harbour seal | 2019-01-04      | Male   | Last year    | Germany | North Sea      | Found dead       | +    |        | SP         |
| PV-GE-014     | Harbour seal | 2019-01-07      | Female | Adult        | Germany | North Sea      | Found dead       | +    | +      | SP, IL*    |
| PV-GE-015     | Harbour seal | 2019-01-08      | Female | Adult        | Germany | North Sea      | Shot             | +    |        | SP         |
| PV-GE-016     | Harbour seal | 2019-03-10      | Female | Last year    | Germany | North Sea      | Shot             |      | +      | IL         |
| PV-GE-017     | Harbour seal | 2019-07-02      | Male   | Last year    | Germany | North Sea      | Found dead       | +    | +      | SP, IL     |
| PV-GE-018     | Harbour seal | 2019-07-23      | Male   | Last year    | Germany | North Sea      | Found dead       | +    | +      | SP, IL     |
| PV-GE-019     | Harbour seal | 2019-12-05      | Female | Adult        | Germany | North Sea      | Found dead       | +    | +      | SP, IL*    |
| PV-DK-053     | Harbour seal | 2019-04-07      | Male   | Last year    | Denmark | The Sound      | Shot             | +    | +      | SP, IL     |
| PV-DK-054     | Harbour seal | 2019-05-15      | Female | Adult        | Denmark | The Sound      | Shot             | +    | +      | SP, IL     |
| PV-DK-055     | Harbour seal | 2019-05-24      | Male   | Current year | Denmark | The Sound      | Shot             | +    | +      | SP, IL     |
| PV-DK-056     | Harbour seal | 2019-06-03      | Male   | Last year    | Denmark | The Sound      | Shot             | +    | +      | SP, IL     |
| PV-DK-057     | Harbour seal | 2019-06-03      | Female | Adult        | Denmark | The Sound      | Shot             | +    | +      | SP, IL     |
| PV-DK-058     | Harbour seal | 2019-08-19      | Female | Current year | Denmark | The Sound      | Bycaught         | +    | +      | SP, IL     |
| PV-DK-059     | Harbour seal | 2019-08-24      | Male   | Adult        | Denmark | The Sound      | Shot             | +    |        | SP, IL     |
| PV-GE-020     | Harbour seal | 2019-03-14      | Male   | -            | Germany | North Sea      | Shot             |      | +      | IL         |

**Supplementary Table S2.** Overview of harbour seal samples screened in this study including sample information such as collection date, sex, age, collection area and sample type listed when possible. (-) indicates that there is no available information. The sample type for each extraction is indicated by SP = Pooled extractions of tracheal swabs, IL = Individual extraction from lung tissue, PL = Pooled extractions of lung tissue from 3-5 individuals. \* = Samples which were screened separately possibly as pooled samples.

**Supplementary Table S3**

| Sample number | Species     | Collection date | Sex    | Age   | Country | Area           | Origin of animal | Swab | Tissue | Extraction |
|---------------|-------------|-----------------|--------|-------|---------|----------------|------------------|------|--------|------------|
| PH-SE-001     | Ringed seal | 2002-04-29      | Female | 2     | Sweden  | Baltic proper  | Bycaught         |      | +      | PL         |
| PH-SE-002     | Ringed seal | 2002-09-30      | Female | 0-1   | Sweden  | Baltic proper  | Bycaught         |      | +      | PL         |
| PH-SE-003     | Ringed seal | 2002-09-22      | Male   | 0-1   | Sweden  | Bothnian Sea   | Bycaught         |      | +      | PL         |
| PH-SE-004     | Ringed seal | 2002-09-24      | Male   | -     | Sweden  | Bothnian Sea   | Bycaught         |      | +      | PL         |
| PH-SE-005     | Ringed seal | 2003-06-26      | Female | -     | Sweden  | Bothnian Bay   | Bycaught         |      | +      | PL         |
| PH-SE-006     | Ringed seal | 2003-05-05      | Male   | 0-1   | Sweden  | Bothnian Sea   | Bycaught         |      | +      | PL         |
| PH-SE-007     | Ringed seal | 2003-08-22      | Female | -     | Sweden  | Bothnian Sea   | Bycaught         |      | +      | PL         |
| PH-SE-008     | Ringed seal | 2003-10-13      | Male   | -     | Sweden  | Bothnian Sea   | Bycaught         |      | +      | PL         |
| PH-SE-009     | Ringed seal | 2006-10-25      | Male   | 0-1   | Sweden  | Baltic proper  | Bycaught         |      | +      | PL         |
| PH-SE-010     | Ringed seal | 2006-10-11      | Female | 0-1   | Sweden  | Bornholm Basin | Bycaught         |      | +      | PL         |
| PH-SE-011     | Ringed seal | 2006-12-13      | Male   | -     | Sweden  | Bothnian Sea   | Bycaught         |      | +      | PL         |
| PH-SE-012     | Ringed seal | 2007-09-19      | Female | Adult | Sweden  | Bothnian Bay   | Found dead       |      | +      | PL         |
| PH-SE-013     | Ringed seal | 2007-05-11      | Male   | 0-1   | Sweden  | Bothnian Sea   | Bycaught         |      | +      | PL         |
| PH-SE-014     | Ringed seal | 2007-06-26      | Male   | -     | Sweden  | Bothnian Sea   | Found alive      |      | +      | PL         |
| PH-SE-015     | Ringed seal | 2007-10-02      | Male   | -     | Sweden  | Bothnian Sea   | Bycaught         |      | +      | PL         |
| PH-SE-016     | Ringed seal | 2007-11-05      | Female | 1     | Sweden  | Bothnian Sea   | Bycaught         |      | +      | PL         |
| PH-SE-017     | Ringed seal | 2008-05-23      | Male   | 12    | Sweden  | Bothnian Bay   | Shot             |      | +      | PL         |
| PH-SE-018     | Ringed seal | 2008-05-28      | Female | 13    | Sweden  | Bothnian Bay   | Shot             |      | +      | PL         |
| PH-SE-019     | Ringed seal | 2008-05-29      | Female | 7     | Sweden  | Bothnian Bay   | Shot             |      | +      | PL         |
| PH-SE-020     | Ringed seal | 2008-06-16      | Male   | 3     | Sweden  | Bothnian Bay   | Shot             |      | +      | PL         |
| PH-SE-021     | Ringed seal | 2008-04-06      | Male   | 0-1   | Sweden  | Bothnian Sea   | Entanglement     |      | +      | PL         |
| PH-SE-022     | Ringed seal | 2008-05-20      | Female | 0-1   | Sweden  | Bothnian Sea   | Entanglement     |      | +      | PL         |
| PH-SE-023     | Ringed seal | 2008-08-02      | Female | 0-1   | Sweden  | Bothnian Sea   | Entanglement     |      | +      | PL         |
| PH-SE-024     | Ringed seal | 2013-04-22      | Male   | 11    | Sweden  | Baltic proper  | Shot             |      | +      | PL         |
| PH-SE-025     | Ringed Seal | 2013-08-27      | Female | 0-1   | Sweden  | Bothnian Bay   | Entanglement     |      | +      | PL         |

| Sample number | Species     | Collection date | Sex    | Age | Country | Area          | Origin of animal | Swab | Tissue | Extraction |
|---------------|-------------|-----------------|--------|-----|---------|---------------|------------------|------|--------|------------|
| PH-SE-026     | Ringed seal | 2013-11-01      | Female | 3   | Sweden  | Bothnian Bay  | Shot             |      | +      | PL         |
| PH-SE-027     | Ringed seal | 2013-11-02      | Male   | 12  | Sweden  | Bothnian Bay  | Shot             |      | +      | PL         |
| PH-SE-028     | Ringed seal | 2013-08-02      | Male   | 14  | Sweden  | Bothnian Sea  | Found alive      |      | +      | PL         |
| PH-SE-029     | Ringed seal | 2013-11-19      | Male   | 3   | Sweden  | Bothnian Sea  | Entanglement     |      | +      | PL         |
| PH-SE-030     | Ringed seal | 2014-09-28      | Male   | 0-1 | Sweden  | Baltic proper | Entanglement     |      | +      | PL         |
| PH-SE-031     | Ringed seal | 2014-06-20      | Male   | 0-1 | Sweden  | Bothnian Bay  | Entanglement     |      | +      | PL         |
| PH-SE-032     | Ringed seal | 2014-10-17      | Male   | 1   | Sweden  | Bothnian Bay  | Entanglement     |      | +      | PL         |
| PH-SE-033     | Ringed seal | 2014-11-03      | Female | 23  | Sweden  | Bothnian Bay  | Shot             |      | +      | PL         |
| PH-SE-034     | Ringed seal | 2014-04-02      | Male   | 0-1 | Sweden  | Bothnian Sea  | Found dead       |      | +      | PL         |
| PH-SE-035     | Ringed seal | 2014-05-26      | Male   | 0-1 | Sweden  | Bothnian Sea  | Entanglement     |      | +      | PL         |
| PH-SE-036     | Ringed seal | 2014-06-28      | Female | 0-1 | Sweden  | Bothnian Sea  | Entanglement     |      | +      | PL         |
| PH-SE-037     | Ringed seal | 2015-10-09      | Female | 0-1 | Sweden  | Baltic proper | Entanglement     |      | +      | PL         |
| PH-SE-038     | Ringed seal | 2015-05-30      | Male   | 29  | Sweden  | Bothnian Bay  | Shot             |      | +      | PL         |
| PH-SE-039     | Ringed seal | 2015-06-22      | Female | 1   | Sweden  | Bothnian Bay  | Shot             |      | +      | PL         |
| PH-SE-040     | Ringed seal | 2015-11-19      | Female | 10  | Sweden  | Bothnian Bay  | Shot             |      | +      | PL         |
| PH-SE-041     | Ringed seal | 2015-12-13      | Male   | 5   | Sweden  | Bothnian Bay  | Shot             |      | +      | PL         |
| PH-SE-042     | Ringed seal | 2015-04-15      | Female | 3   | Sweden  | Bothnian Sea  | Shot             |      | +      | PL         |
| PH-SE-043     | Ringed seal | 2015-05-27      | Female | 0-1 | Sweden  | Bothnian Sea  | Entanglement     |      | +      | PL         |
| PH-SE-044     | Ringed seal | 2017-05-06      | Male   | 18  | Sweden  | Bothnian Bay  | Shot             |      | +      | PL         |
| PH-SE-045     | Ringed seal | 2017-08-01      | Female | 9   | Sweden  | Bothnian Bay  | Shot             |      | +      | PL         |
| PH-SE-046     | Ringed seal | 2017-08-21      | Male   | 8   | Sweden  | Bothnian Bay  | Shot             |      | +      | PL         |
| PH-SE-047     | Ringed seal | 2017-09-24      | Male   | 5   | Sweden  | Bothnian Bay  | Shot             |      | +      | PL         |
| PH-SE-048     | Ringed seal | 2017-10-01      | Male   | 26  | Sweden  | Bothnian Bay  | Shot             |      | +      | PL         |
| PH-SE-049     | Ringed seal | 2017-10-05      | Female | 17  | Sweden  | Bothnian Bay  | Shot             |      | +      | PL         |
| PH-SE-050     | Ringed seal | 2017-10-22      | Female | 11  | Sweden  | Bothnian Bay  | Shot             |      | +      | PL         |

| Sample number | Species     | Collection date | Sex    | Age | Country | Area           | Origin of animal | Swab | Tissue | Extraction |
|---------------|-------------|-----------------|--------|-----|---------|----------------|------------------|------|--------|------------|
| PH-SE-051     | Ringed seal | 2017-10-29      | Female | 11  | Sweden  | Bothnian Bay   | Shot             |      | +      | PL         |
| PH-SE-052     | Ringed seal | 2017-11-05      | Female | 0-1 | Sweden  | Bothnian Bay   | Shot             |      | +      | PL         |
| PH-SE-053     | Ringed seal | 2017-06-03      | Male   | 0-1 | Sweden  | Bothnian Sea   | Entanglement     |      | +      | PL         |
| PH-SE-054     | Ringed seal | 2017-10-20      | Female | 0-1 | Sweden  | Bothnian Sea   | Entanglement     |      | +      | IL         |
| PH-SE-055     | Ringed seal | 2017-12-18      | Male   | 0-1 | Sweden  | Bothnian Sea   | Shot             |      | +      | PL         |
| PH-SE-056     | Ringed seal | 2018-03-15      | Male   | 23  | Sweden  | Baltic proper  | Found dead       |      | +      | PL         |
| PH-SE-057     | Ringed seal | 2018-06-12      | Female | -   | Sweden  | Bothnian Bay   | Shot             | +    | +      | SP, PL     |
| PH-SE-058     | Ringed seal | 2018-06-13      | Male   | -   | Sweden  | Bothnian Bay   | Shot             | +    | +      | SP, PL     |
| PH-SE-059     | Ringed seal | 2018-06-14      | Male   | -   | Sweden  | Bothnian Bay   | Shot             | +    | +      | SP, PL     |
| PH-SE-060     | Ringed seal | 2018-06-14      | Female | -   | Sweden  | Bothnian Bay   | Shot             | +    | +      | SP, PL     |
| PH-SE-061     | Ringed seal | 2018-06-14      | Female | -   | Sweden  | Bothnian Bay   | Shot             | +    | +      | SP, PL     |
| PH-SE-062     | Ringed seal | 2018-10-18      | Male   | -   | Sweden  | Bothnian Bay   | Drowning         | +    | +      | SP, IL     |
| PH-SE-063     | Ringed seal | 2018-09-02      | Male   | -   | Sweden  | Danish straits | Found dead       |      | +      | IL         |
| PH-SE-064     | Ringed seal | 2019-06-04      | Male   | -   | Sweden  | Bothnian Bay   | Shot             | +    | +      | SP, IL*    |
| PH-SE-065     | Ringed seal | 2019-06-05      | Female | -   | Sweden  | Bothnian Bay   | Shot             | +    | +      | SP, IL*    |
| PH-SE-066     | Ringed seal | 2019-06-05      | Male   | -   | Sweden  | Bothnian Bay   | Shot             | +    | +      | SP, IL*    |
| PH-SE-067     | Ringed seal | 2019-06-05      | Male   | -   | Sweden  | Bothnian Bay   | Shot             | +    | +      | SP, IL*    |
| PH-SE-068     | Ringed seal | 2019-06-06      | Female | -   | Sweden  | Bothnian Bay   | Shot             | +    | +      | SP, IL*    |
| PH-SE-069     | Ringed seal | 2019-06-07      | Female | -   | Sweden  | Bothnian Bay   | Shot             |      | +      | SP, IL*    |
| PH-SE-070     | Ringed seal | 2019-06-07      | Female | -   | Sweden  | Bothnian Bay   | Shot             |      | +      | SP, IL*    |
| PH-SE-071     | Ringed seal | 2019-06-07      | Female | -   | Sweden  | Bothnian Bay   | Shot             | +    | +      | SP, IL*    |
| PH-SE-072     | Ringed seal | 2019-06-07      | Male   | -   | Sweden  | Bothnian Bay   | Shot             | +    | +      | SP, IL*    |
| PH-SE-073     | Ringed seal | 2019-06-07      | Female | -   | Sweden  | Bothnian Bay   | Shot             | +    | +      | SP, IL*    |

**Supplementary Table S3.** Overview of ringed seal samples screened in this study including sample information such as collection date, sex, age, collection area and sample type listed when possible. (-) indicates that there is no available information. The sample type for each extraction is indicated by SP = Pooled extractions of tracheal swabs, IL = Individual extraction from lung tissue, PL = Pooled extractions of

lung tissue from 3-5 individuals and PMO = Pooled extractions of mixed organs (lung, spleen, mesenteric lymph node, liver and brain) from the same individual. \* = Samples which were screened separately possibly as pooled samples.

**Supplementary Table S4.**

| Sample number | Species          | Collection date | Sex    | Age      | Country | Area           | Origin of animal | Swab | Tissue | Extraction |
|---------------|------------------|-----------------|--------|----------|---------|----------------|------------------|------|--------|------------|
| PP-DK-001     | Harbour porpoise | 2007-05-22      | Male   | Adult    | Denmark | Kattegat       | Found dead       |      | +      | IL         |
| PP-DK-002     | Harbour porpoise | 2007-04-10      | Male   | Immature | Denmark | Zealand        | Bycaught         |      | +      | PL         |
| PP-DK-003     | Harbour porpoise | 2010-01-05      | Male   | -        | Denmark | Danish straits | Found dead       |      | +      | PL         |
| PP-DK-004     | Harbour porpoise | 2010-05-13      | Male   | -        | Denmark | Danish straits | Bycaught         |      | +      | PL         |
| PP-DK-005     | Harbour porpoise | 2010-03-09      | Male   | Immature | Denmark | Kattegat       | Bycaught         |      | +      | IL         |
| PP-DK-006     | Harbour porpoise | 2010-04-07      | Male   | -        | Denmark | Kattegat       | Bycaught         |      | +      | PL         |
| PP-DK-007     | Harbour porpoise | 2010-05-02      | Male   | -        | Denmark | Kattegat       | Bycaught         |      | +      | PL         |
| PP-DK-008     | Harbour porpoise | 2010-05-28      | Male   | -        | Denmark | Kattegat       | Bycaught         |      | +      | PL         |
| PP-DK-009     | Harbour porpoise | 2010-06-03      | Female | -        | Denmark | Kattegat       | Bycaught         |      | +      | IL         |
| PP-DK-010     | Harbour porpoise | 2010-06-19      | Female | -        | Denmark | Kattegat       | Bycaught         |      | +      | IL         |
| PP-DK-011     | Harbour porpoise | 2010-12-04      | Male   | -        | Denmark | Skagerrak      | Bycaught         |      | +      | IL         |
| PP-DK-012     | Harbour porpoise | 2010-03-15      | Female | -        | Denmark | The Sound      | Bycaught         |      | +      | PL         |
| PP-DK-013     | Harbour porpoise | 2010-03-15      | Female | -        | Denmark | The Sound      | Bycaught         |      | +      | PL         |
| PP-DK-014     | Harbour porpoise | 2010-04-15      | Male   | -        | Denmark | The Sound      | Found dead       |      | +      | PL         |
| PP-DK-015     | Harbour porpoise | 2010-04-22      | Male   | -        | Denmark | The Sound      | Bycaught         |      | +      | PL         |
| PP-DK-016     | Harbour porpoise | 2010-04-22      | Male   | -        | Denmark | The Sound      | Bycaught         |      | +      | PL         |
| PP-DK-017     | Harbour porpoise | 2010-04-29      | Female | -        | Denmark | The Sound      | Bycaught         |      | +      | PL         |
| PP-DK-018     | Harbour porpoise | 2010-06-04      | Male   | Immature | Denmark | The Sound      | Bycaught         |      | +      | IL         |
| PP-DK-019     | Harbour porpoise | 2010-06-04      | Male   | Immature | Denmark | The Sound      | Bycaught         |      | +      | IL         |
| PP-DK-020     | Harbour porpoise | 2010-06-08      | Male   | Immature | Denmark | The Sound      | Bycaught         |      | +      | IL         |
| PP-DK-021     | Harbour porpoise | 2010-07-14      | Male   | -        | Denmark | The Sound      | Bycaught         |      | +      | PL         |
| PP-DK-022     | Harbour porpoise | 2010-07-22      | Female | -        | Denmark | The Sound      | Bycaught         |      | +      | IL         |
| PP-DK-023     | Harbour porpoise | 2010-08-05      | Female | -        | Denmark | The Sound      | Drowned          |      | +      | IL         |
| PP-DK-024     | Harbour porpoise | 2011-08-05      | Female | -        | Denmark | Danish Straits | Bycaught         |      | +      | IL         |

| Sample number | Species          | Collection date | Sex    | Age      | Country | Area             | Origin of animal        | Swab | Tissue | Extraction |
|---------------|------------------|-----------------|--------|----------|---------|------------------|-------------------------|------|--------|------------|
| PP-DK-025     | Harbour porpoise | 2011-07-02      | Female | Adult    | Denmark | Kattegat         | Bycaught?               |      | +      | IL         |
| PP-DK-026     | Harbour porpoise | 2011-02-04      | Female | Juvenile | Denmark | Zealand          | Bycaught                |      | +      | IL         |
| PP-DK-027     | Harbour porpoise | 2012-07-02      | Female | -        | Denmark | North Sea        | Found dead              |      | +      | IL         |
| PP-DK-028     | Harbour porpoise | 2015-09-10      | Male   | 0 years  | Denmark | The Sound        | Found dead              |      | +      | IL         |
| PP-DK-029     | Harbour porpoise | 2017-09-28      | Female | 0 years  | Denmark | Danish straits   | Found dead              |      | +      | IL         |
| PP-SE-001     | Harbour porpoise | 2017-11-20      | Male   | Adult    | Sweden  | The Sound        | Found dead, pneumea     |      | +      | IL         |
| PP-DK-030     | Harbour porpoise | 2018-04-05      | Male   | -        | Denmark | Danish straits   | Found dead in pound net |      | +      | IL         |
| PP-DK-031     | Harbour porpoise | 2018-04-19      | Male   | -        | Denmark | Danish straits   | Bycaught                |      | +      | IL         |
| PP-GE-001     | Harbour porpoise | 2018-08-01      | Male   | -        | Germany | Danish Straits   | Bycaught?               | +    | +      | SP, IL     |
| PP-DK-032     | Harbour porpoise | 2018-09-01      | Female | Neonate  | Denmark | Danish Straits   | Found dead              | +    | +      | SP, IL     |
| PP-GE-002     | Harbour porpoise | 2018-12-01      | Male   | -        | Germany | Danish Straits   | Bycaught                | +    | +      | SP*, IL    |
| PP-SE-002     | Harbour porpoise | 2018-12-18      | Male   | Adult    | Sweden  | Kattegat (Skåne) | Found dead              |      | +      | IL         |
| PP-SE-003     | Harbour porpoise | 2018-03-14      | Female | Subadult | Sweden  | The Sound        | Entanglement            |      | +      | IL         |
| PP-SE-004     | Harbour porpoise | 2018-04-08      | Male   | Subadult | Sweden  | The Sound        | Found dead              |      | +      | IL         |
| PP-DK-033     | Harbour porpoise | 2019-09-05      | Male   | Adult    | Denmark | Bornholm Basin   | Found dead              | +    | +      | SP, IL     |
| PP-GE-003     | Harbour porpoise | 2019-02-25      | Female | -        | Germany | Danish Straits   | Found dead              | +    | +      | SP, IL     |
| PP-DK-034     | Harbour porpoise | 2019-07-27      | Female | Neonate  | Denmark | Danish Straits   | Found dead              |      | +      | IL         |
| PP-GE-004     | Harbour porpoise | 2019-08-08      | Male   | -        | Germany | Danish Straits   | Bycaught                | +    | +      | SP, IL     |
| PP-GE-005     | Harbour porpoise | 2019-08-10      | Female | Adult    | Germany | Danish Straits   | Found dead              |      | +      | IL         |
| PP-GE-006     | Harbour porpoise | 2019-08-11      | Female | Neonat   | Germany | Danish Straits   | Found dead              |      | +      | PMO        |
| PP-GE-007     | Harbour porpoise | 2019-08-14      | Female | Juvenile | Germany | Danish Straits   | Bycaught?               |      | +      | PMO        |
| PP-DK-035     | Harbour porpoise | 2019-08-22      | Male   | Neonate  | Denmark | Danish Straits   | Found dead              | +    | +      | SP, IL     |
| PP-GE-008     | Harbour porpoise | 2019-08-24      | Male   | -        | Germany | Danish Straits   | Bycaught                | +    | +      | SP, IL     |
| PP-GE-009     | Harbour porpoise | 2019-09-07      | Female | Juvenile | Germany | Danish Straits   | Found dead              |      | +      | PMO        |



| Sample number | Species          | Collection date | Sex    | Age      | Country | Area           | Origin of animal | Swab | Tissue | Extraction |
|---------------|------------------|-----------------|--------|----------|---------|----------------|------------------|------|--------|------------|
| PP-GE-010     | Harbour porpoise | 2019-09-10      | Female | Adult    | Germany | Danish Straits | Bycaught?        | +    | +      | SP, IL     |
| PP-GE-011     | Harbour porpoise | 2019-09-17      | Male   | Neonat   | Germany | Danish Straits | Bycaught         | +    | +      | SP, IL     |
| PP-GE-012     | Harbour porpoise | 2019-09-19      | Female | Juvenile | Germany | Danish Straits | Found dead       |      | +      | PMO        |
| PP-GE-013     | Harbour porpoise | 2019-09-19      | Male   | Neonat   | Germany | Danish Straits | Found dead       |      | +      | PMO        |
| PP-GE-014     | Harbour porpoise | 2019-09-21      | Male   | Juvenile | Germany | Danish Straits | Found dead       |      | +      | PMO        |
| PP-GE-015     | Harbour porpoise | 2019-09-23      | Male   | Juvenile | Germany | Danish Straits | Bycaught?        |      | +      | PMO        |
| PP-DK-036     | Harbour porpoise | 2019-09-27      | Male   | Juvenile | Denmark | Danish Straits | Found dead       | +    | +      | SP, IL     |
| PP-GE-016     | Harbour porpoise | 2019-09-27      | Male   | Juvenile | Germany | Danish Straits | Found dead       |      | +      | PMO        |
| PP-GE-017     | Harbour porpoise | 2019-09-29      | Female | Juvenile | Germany | Danish Straits | Found dead       |      | +      | PMO        |
| PP-GE-018     | Harbour porpoise | 2019-10-02      | Male   | Juvenile | Germany | Danish Straits | Found dead       | +    | +      | SP, IL     |
| PP-GE-019     | Harbour porpoise | 2019-10-02      | Male   | Neonat   | Germany | Danish Straits | Bycaught?        | +    | +      | SP, IL     |
| PP-GE-020     | Harbour porpoise | 2019-10-02      | Male   | Juvenile | Germany | Danish Straits | Found dead       |      | +      | PMO        |
| PP-GE-021     | Harbour porpoise | 2019-10-04      | Female | Juvenile | Germany | Danish Straits | Found dead       |      | +      | PMO        |
| PP-GE-022     | Harbour porpoise | 2019-10-13      | Female | Juvenile | Germany | Danish Straits | Bycaught?        |      | +      | PMO        |
| PP-GE-023     | Harbour porpoise | 2019-10-14      | Female | Adult    | Germany | Danish Straits | Found dead       |      | +      | PMO        |
| PP-GE-024     | Harbour porpoise | 2019-10-21      | Male   | Juvenile | Germany | Danish Straits | Bycaught?        |      | +      | PMO        |
| PP-GE-025     | Harbour porpoise | 2019-10-30      | Female | Juvenile | Germany | Danish Straits | Found dead       |      | +      | PMO        |
| PP-GE-026     | Harbour porpoise | 2019-11-05      | Female | Juvenile | Germany | Danish Straits | Found dead       |      | +      | PMO        |
| PP-GE-027     | Harbour porpoise | 2019-11-22      | Female | Juvenile | Germany | Danish Straits | Bycaught?        |      | +      | PMO        |
| PP-GE-028     | Harbour porpoise | 2019-11-24      | Female | Adult    | Germany | Danish Straits | Found dead       |      | +      | PMO        |
| PP-GE-029     | Harbour porpoise | 2019-12-17      | Female | Juvenile | Germany | Danish Straits | Bycaught         |      | +      | PMO        |
| PP-GE-030     | Harbour porpoise | 2019-10-12      | Female | Adult    | Germany | German Baltic  | Found dead       |      | +      | PMO        |
| PP-DK-037     | Harbour porpoise | 2019-03-06      | Female | Juvenile | Denmark | Kattegat       | Bycaught         | +    | +      | SP, IL     |
| PP-DK-038     | Harbour porpoise | 2019-05-23      | Male   | Juvenile | Denmark | Kattegat       | Found dead       | +    | +      | SP, IL     |

| Sample number | Species          | Collection date | Sex    | Age      | Country | Area      | Origin of animal | Swab | Tissue | Extraction |
|---------------|------------------|-----------------|--------|----------|---------|-----------|------------------|------|--------|------------|
| PP-DK-039     | Harbour porpoise | 2019-07-20      | Female | Juvenile | Denmark | Kattegat  | Found dead       | +    | +      | SP, IL     |
| PP-DK-040     | Harbour porpoise | 2019-10-02      | Male   | Juvenile | Denmark | Kattegat  | Bycaught?        | +    | +      | SP, IL     |
| PP-GE-031     | Harbour porpoise | 2019-04-11      | Male   | Juvenile | Germany | North Sea | Found dead       | +    |        | SP         |
| PP-GE-032     | Harbour porpoise | 2019-04-16      | Male   | Juvenile | Germany | North Sea | Found dead       | +    | +      | SP, IL     |
| PP-GE-033     | Harbour porpoise | 2019-09-22      | Male   | Neonat   | Germany | North Sea | Found dead       | +    | +      | SP, IL     |
| PP-DK-041     | Harbour porpoise | 2019-03-06      | Male   | Juvenile | Denmark | The Sound | Bycaught         |      | +      | IL         |

**Supplementary Table S4.** Overview of harbour porpoise samples screened in this study including sample information such as collection date, sex, age, collection area and sample type listed when possible. (-) indicates that there is no available information. The sample type for each extraction is indicated by SP = Pooled extractions of tracheal swabs, IL = Individual extraction from lung tissue, PL = Pooled extractions of lung tissue from 3-5 individuals and PMO = Pooled extractions of mixed organs (lung, spleen, mesenteric lymph node, liver and brain) from the same individual. \* Indicates one swap (PP-GE-002) taken from the blowhole of a harbour porpoise
